# The CYP2E1 inhibitor DDC up-regulates MMP-1 expression in hepatic stellate cells via an ERK1/2- and Akt-dependent mechanism

Tianhui LIU, Ping WANG, Min CONG, Youqing XU, Jidong JIA and Hong YOU<sup>1</sup>

Liver Research Center, Beijing Friendship Hospital, Capital Medical University, Beijing 100050, People's Republic of China

## Synopsis

DDC (diethyldithiocarbamate) could block collagen synthesis in HSC (hepatic stellate cells) through the inhibition of ROS (reactive oxygen species) derived from hepatocyte CYP2E1 (cytochrome P450 2E1). However, the effect of DDC on MMP-1 (matrix metalloproteinase-1), which is the main collagen degrading matrix metalloproteinase, has not been reported. In co-culture experiments, we found that DDC significantly enhanced MMP-1 expression in human HSC (LX-2) that were cultured with hepatocyte C3A cells either expressing or not expressing CYP2E1. The levels of both proenzyme and active MMP-1 enzyme were up-regulated in LX-2 cells, accompanied by elevated enzyme activity of MMP-1 and decreased collagen I, in both LX-2 cells and the culture medium. H<sub>2</sub>O<sub>2</sub> treatment abrogated DDC-induced MMP-1 up-regulation and collagen I decrease, while catalase treatment slightly up-regulated MMP-1 expression. These data suggested that the decrease in ROS by DDC was partially responsible for the MMP-1 up-regulation. ERK1/2 (extracellular signal-regulated kinase 1/2), Akt (protein kinase B) and p38 were significantly activated by DDC. The ERK1/2 inhibitor (U0126) and Akt inhibitor (T3830) abrogated the DDC-induced MMP-1 up-regulation. In addition, a p38 inhibitor (SB203580) improved MMP-1 up-regulation through the stimulation of ERK1/2. Our data indicate that DDC significantly up-regulates the expression of MMP-1 in LX-2 cells which results in greater MMP-1 enzyme activity and decreased collagen I. The enhancement of MMP-1 expression by DDC was associated with H<sub>2</sub>O<sub>2</sub> inhibition and coordinated regulation by the ERK1/2 and Akt pathways. These data provide some new insights into treatment strategies for hepatic fibrosis.

**Key words:** collagen, cytochrome P450 2E1, diethyldithiocarbamate, matrix metalloproteinase-1, mitogen-activated protein kinases, reactive oxygen species

Cite this article as: Liu, T., Wang, P., Cong, M., Xu, Y., Jia, J. and You, H. (2013) The CYP2E1 inhibitor DDC up-regulates MMP-1 expression in hepatic stellate cells via an ERK1/2- and Akt-dependent mechanism. *Biosci. Rep.* **33**(3), art:e00041.doi:10.1042/BSR20130033

## INTRODUCTION

DDC (diethyldithiocarbamate) and its derivatives are widely used in clinical applications. DDC can act as a radioprotective agent and its derivative, disulfiram, is used clinically to treat alcoholism because of its ability to inhibit ALDH (aldehyde dehydrogenase) [1,2]. It has been reported that low doses of DDC protect against liver injury induced by many hepatotoxic agents *via* inhibitory activity on drug metabolizing enzymes and antioxidant effects in rats [3]. DDC or disulfiram (pro-drug of DDC) is widely used for

inhibition of CYP2E1 (cytochrome P450 2E1) in human studies because of its selectivity and relative lack of toxicity [4].

CYP2E1 is highly expressed in the liver where it has a great capacity to produce ROS (reactive oxygen species) [5,6], which may lead to oxidative stress. Hepatic CYP2E1 has been linked to the pathogenesis of ASH (alcoholic steatohepatitis) [7], hepatic steatosis and NASH (non-alcoholic steatohepatitis) [8–10]. As the common complication of most chronic liver diseases, including ASH and NASH, liver fibrosis is triggered by chronic liver injury and develops from a series of events. After liver injury, damaged hepatocytes release ROS which, subsequently,

**Abbreviations used:** Akt, protein kinase B; ASH, alcoholic steatohepatitis; CYP2E1, cytochrome P450 2E1; DCF, dichlorofluorescein; DDC, diethyldithiocarbamate; ECM, extracellular matrix; ERK, extracellular signal-regulated kinase; HSC, hepatic stellate cell; MAPK, mitogen-activated protein kinases; MMP-1, matrix metalloproteinase-1; NASH, non-alcoholic steatohepatitis; ROS, reactive oxygen species.

<sup>1</sup> To whom correspondence should be addressed (email youhong30@sina.com).

have some effect on HSC (hepatic stellate cells). Basic research has demonstrated that HSCs are the key fibrogenic cells through synthesizing and secreting ECM (extracellular matrix) [11]. Repeated hepatocyte injury and uncontrolled repair processes result in liver fibrosis characterized by substantial deposition of ECM [12–15]. *In vitro* studies demonstrated that elevated H<sub>2</sub>O<sub>2</sub>, generated by hepatocytes expressing CYP2E1 increased the intracellular concentration of H<sub>2</sub>O<sub>2</sub> in HSCs, which subsequently activated HSCs and induced collagen I production [16,17].

Since CYP2E1-derived ROS are involved in fibrogenesis, the inhibitory effects of antioxidants and CYP2E1 inhibitors on liver fibrosis have been investigated both *in vivo* and *in vitro* [18–21]. It has been demonstrated that DDC directly suppresses collagen I protein by decreasing ROS [16]. However, it is not clear whether DDC modulates other proteins or signalling pathways which may contribute to the decrease in collagen I protein. Liver fibrosis is characterized by excessive deposition of type I collagen fibrils in the Disse's space [22]. Changes in collagen I protein may be due to transcription of collagen mRNA in combination with protein degradation. During the degradation process, MMP-1 (matrix metalloproteinase-1) plays the most important role in fibrolysis, especially by degrading excessive deposition of type I collagen [23]. Therefore we hypothesized that DDC may decrease collagen I through modulation of MMP-1 expression.

In this study, a co-culture model was established, based on the co-incubation of the human hepatic cell lines (C3A), expressing CYP2E1 (C3A-2E1 cells) or non-CYP2E1 expressing cells (C3A cells), with human HSC (LX-2). We examined the effect of DDC on MMP-1 expression and enzyme activity in LX-2 cells. In addition, we investigated the role of H<sub>2</sub>O<sub>2</sub>, and other molecular mechanisms that may regulate MMP-1 expression.

## MATERIAL AND METHODS

### Materials

DDC, T3830 [Akt (protein kinase B) inhibitor], catalase, and H<sub>2</sub>O<sub>2</sub> were purchased from Sigma-Aldrich (St. Louis). U0126 [ERK1/2 (extracellular signal-regulated kinase) inhibitor] was purchased from Promega (Madison). SB203580 (p38 inhibitor) was purchased from Invitrogen. Vitamin E was purchased from SUPELCO. Anti-CYP2E1 (cat. no. ab53945) was purchased from Abcam. Anti-p38 (cat. no. 4511) and anti-phospho-p38 (cat. no. 9212) were purchased from CST. Anti-MMP-1 (cat. no. MAB901), anti-ERK1/2 (cat. no. AF1576), anti-phospho-ERK1/2 (cat. no. MAB1018), anti-Akt (cat. no. AF887) and anti-phospho-Akt (cat. no. MAB2055) were purchased from R&D. Anti-MMP-1 (active form only, cat. no. MAB3223) was purchased from Millipore. Anti-col1A2 (cat. no. 14695-1-AP) was purchased from Proteintech.

### Cell transfection and selection

C3A cells were transfected with the pCI-neo (without the *CYP2E1* gene) or pCI-2E1 plasmid (with the *CYP2E1* gene) using Fugene HD (Roche Diagnostic). Cells were then selected with 0.8 mg/ml geneticin (G-418); colonies formed from the surviving cells were grown to large scale, and subjected to real-time (RT)-PCR and Western blotting analysis to determine CYP2E1 expression.

### Cell culture

The model used in most experiments is based on co-culturing C3A cell lines, expressing CYP2E1 (C3A cells) or not (C3A-2E1 cells), with LX-2 cells (Figure 1C). Cells were co-cultured using cell culture inserts (3 µm pore size) to separate the cell populations; the LX-2 cells were plated on the bottom, and the C3A cells were plated on the insert to create a gravity gradient of the released mediators. A 5:1 ratio of C3A/LX-2 was chosen, because this was considered to represent the ratio of parenchymal/non-parenchymal cells in the liver. After overnight incubation of LX-2 cells in DMEM (Dulbecco's modified Eagle's medium) supplemented with 10% (v/v) fetal bovine serum, the LX-2 medium was discarded, the cell culture inserts containing the overnight-incubated C3A or C3A-2E1 cells were transferred, and the medium from these cells was added to the co-culture systems. At this time, DDC, H<sub>2</sub>O<sub>2</sub>, catalase, vitamin E or inhibitors for signalling pathways were added (*t* = 0 h). After 24 h co-culture, the cells and supernatants were collected for different assays. For detecting the secreted protein levels in the culture medium, the serum-free medium was used for the co-culture systems.

### Measurement of intracellular ROS

ROS levels were determined by measuring the oxidative conversion of DCFH-DA (2',7'-dichlorofluorescein diacetate) to the fluorescent compound DCF (dichlorofluorescein). Fluorescence was measured by flow cytometry on an FACScan flow cytometer, using an excitation wavelength of 488 nm and an emission wavelength of 525 nm. Finally, ROS generation was quantified by the percentage of DCF-positive cells of 10000 cells. All measurements were performed in triplicate.

### Measurement of collagen I in cell culture medium by ELISA

The ELISA kit for human collagen I was purchased from BlueGene. The levels of collagen I secreted from LX-2 cells were quantified according to the manufacturer's guidelines. All samples were assayed in duplicates. The measurements were repeated at least three times, with independent cell batches.

### RT-PCR for CYP2E1 and MMP-1

Total RNA was isolated from C3A or LX-2 cells using Trizol<sup>®</sup> reagent (Invitrogen) according to the manufacturer's instructions.

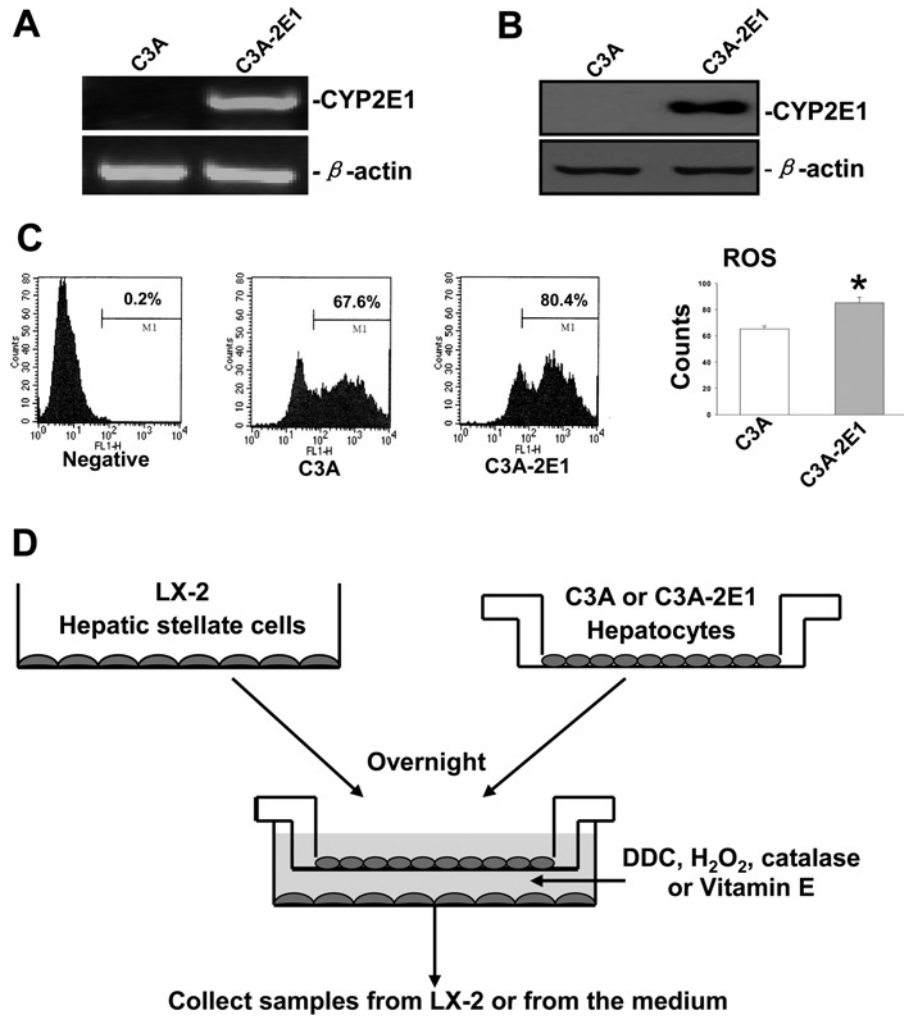

**Figure 1** Establishment and identification of C3A-2E1 cell lines expressing human CYP2E1 and the scheme of the co-culture model

(A) RT-PCR analysis of total RNA to detect CYP2E1 expression in C3A cells transfected with pCI-neo (lane 1) and pCI-2E1 plasmids (lane 2). (B) 50  $\mu$ g aliquots of total protein extracts from C3A cells were subjected to Western blotting analysis with polyclonal rabbit anti-human CYP2E1 antibody and  $\beta$ -actin antibody as a loading control. (C) Intracellular ROS levels in C3A cells transfected with pCI-neo and pCI-2E1 plasmids. (D) Scheme of the co-culture model of C3A cells, expressing (C3A-2E1) or not expressing (C3A) CYP2E1 with LX-2 cells. Cells were plated at a 5:1 ratio of C3A cells/LX-2. LX-2 cells were cultured alone overnight, then the cell culture inserts containing C3A cells were transferred together with the culture medium to the plates containing the LX-2 cells; this defined the beginning of the co-culture period. Samples of LX-2 cells or culture medium were collected at different time points.

The yield of total RNA was quantified and equivalent amounts of total RNA (2  $\mu$ g) were reverse-transcribed into single-stranded cDNA. PCR was performed on 100 ng reverse-transcribed total RNA from each sample. The primers were: (1) *CYP2E1*, forward: 5'-TCATAGCCGACATCCTCTTC-3', reverse: 5'-GTTGTGCTGGTGGTCTCTGT-3'; (2)  *$\beta$ -actin*, forward: 5'-GGGCATGGGTCAGAAGGATT-3' reverse: 5'-GAGGCGTACAGGGATAGCAC-3' and (3) *MMP-1*, forward: 5'-AGCTAGCTCAGGATGACATTGATG-3' reverse: 5'-TCAGAAAGAGCAGCATCGATATG-3'.

#### Quantification of MMP-1 expression by RT-PCR

To monitor the modulation of *MMP-1* mRNA levels, a quantitative RT-PCR approach was used. Equal amounts of cDNA were subjected to PCR in the presence of SYBR green dye, with the ABI Power SYBR Green PCR Master Mix kit (Applied Biosystems) on an ABI Prism 7300 Sequence Detector (Applied Biosystems). PCR without template was used as a negative control.  *$\beta$ -actin* mRNA was used as an internal control. The primers used were: *MMP-1* forward: 5'-GATGAAGTCCGGTTTTTCAAAG-3', reverse: 5'-GGGGTATCCGTGTAGCACCAT-3';

and  $\beta$ -actin forward: 5'-AGCAAGCAGGAGTATGACG-3', reverse: 5'-AAAGGGTGTAACGCAACTAA-3'. PCR was performed with 50 cycles of 15 s at 95°C and 60 s at 60°C after a 2 min initial denaturation at 95°C. Each sample was normalized by the difference in CT (critical thresholds) between the target gene and  $\beta$ -actin, and relative to the control, the amount of target was given as  $2^{-\Delta\Delta CT}$ . All experiments were performed independently three times, and the average was used for comparison.

### Casein zymography for MMP-1

For assessment of MMP-1 activity, casein zymography was performed [24,25]. Thirty  $\mu$ g of LX-2 lysates or 20  $\mu$ l aliquots of 10-fold concentrated culture medium passed through centricon columns (molecular mass cut-off of 50 kDa, Millipore) with 5 $\times$  loading buffer [0.25 M Tris pH 6.8, 50% (v/v) glycerol, 5% (w/v) SDS, bromophenol blue] and were run on Novex 4–16% Zymogram (Blue Casein) Gel (Invitrogen) at 125 V for 2 h (buffer 25 mM Tris, 190 mM glycine, 0.1% SDS). Gels were incubated in 2.5% (v/v) Triton X for 1 h at room temperature with agitation and then collagenase buffer (55 mM Tris base, 200 mM sodium chloride, 5 mM calcium chloride, 0.02% Brij, pH 7.6) for 30 min. Gels were then incubated for 24 h in fresh collagenase buffer at 37°C. Densitometric analysis of zymography gels was performed with the Quantity One<sup>®</sup> software package.

### Phospho-proteome profiling

Cells were rinsed with PBS and immediately solubilized in lysis buffer at 4°C for 30 min. Following microcentrifugation at 14000 g for 5 min, supernatants were transferred into a new tube and protein concentrations were determined using the Pierce Protein assay kit (Pierce). 200  $\mu$ g of LX-2 lysates were diluted and incubated with the Human Phospho-MAPK (mitogen-activated protein kinases) Array Kit (Proteome Profiler<sup>™</sup>; R&D) according to the manufacturer's instructions. Phospho-MAPK Array data were developed on X-ray films following exposure to chemiluminescent reagents (Pierce).

### Western blot analyses

To monitor CYP2E1, MMP-1, collagen I and MAPKs protein levels, Western blotting was used. Protein mixtures were separated on SDS/12%PAGE electrophoresis gels and transferred onto nitrocellulose membranes (Amersham Biosciences). Membranes were blocked and then incubated with anti-CYP2E1 (1:1000), anti-MMP-1 (1:500), anti-ERK1/2 (1:1000), anti-phospho-ERK1/2 (1:500), anti-p38 (1:1000), anti-phospho-p38 (1:1000), anti-Akt (1:2000), anti-phospho-Akt (1:1000), anti-COL1A2(1:800) and anti- $\beta$ -actin (1:5000) at 4°C overnight. After extensive washing, membranes were incubated with the secondary antibody for 60 min, followed by extensive washes. Specific antibody-antigen complexes were detected with the ECL Western blotting detection kit (Pierce). All experiments were performed independently at least three times, and the protein expres-

sion was quantified by densitometric analysis of immunoblots using the Quantity One software.

### Statistical analysis

All values are indicated as the mean  $\pm$  S.E.M. Two-group comparisons were carried out by the Student's *t* test. Comparisons of means of three or more groups were carried out by ANOVA, and then by LSD (least significant difference) test when the variance was equal and by Dunnett T3 test when the variance was unequal. A difference with  $P < 0.05$  was considered statistically significant.

## RESULTS

### Establishment of C3A-2E1 cell lines expressing human CYP2E1 and the co-culture model

C3A cells, derived from HepG2 cells, are a human hepatoblastoma cell line that maintains several liver functions but do not express CYP2E1. Since CYP2E1 is expressed in normal hepatocytes, we established a C3A cell model expressing CYP2E1. C3A cells were transfected with pCI-neo plasmid (without CYP2E1) or with pCI-2E1 plasmid (with CYP2E1). RT-PCR results demonstrated that C3A cells transfected with pCI-neo (C3A) did not express CYP2E1 (Figure 1A, lane 1), in contrast with C3A cells transfected with pCI-2E1 (C3A-2E1), which expressed significant amounts of CYP2E1 (Figure 1A, lane 2). Western blotting analysis showed a clear ~54 kDa band, representing CYP2E1 expression (Figure 1B, lane 2), whereas the C3A cells did not express detectable levels of CYP2E1 (Figure 1B, lanes 1). ROS levels were measured in both cell lines, and were found to be elevated by 20% in C3A-2E1 cells compared with C3A cells (Figure 1C). These data indicated that C3A-2E1 cells expressed CYP2E1 and produced more ROS. C3A or C3A-2E1 cells were then co-cultured with LX-2 cells (see Figure 1D for the co-culture model scheme).

### CYP2E1 inhibitor DDC lowered intracellular ROS in LX-2 cells and inhibited the production and secretion of collagen I from LX-2 cells

To investigate whether CYP2E1-derived products such as ROS from C3A-2E1 cells can diffuse and create a pro-oxidant stress in LX-2 cells and the effect of DDC on ROS, we measured the levels of ROS both in C3A or C3A-2E1 cells and in LX-2 cells after 24 h of co-culture (with or without 100  $\mu$ M DDC). As shown in Figure 2A, ROS were elevated in C3A-2E1 cells when compared with C3A cells ( $P < 0.05$ ), and were reduced in both C3A and C3A-2E1 cells following DDC treatment. Meanwhile, ROS was elevated in LX-2 cells co-cultured with C3A-2E1 cells when compared with those co-cultured with C3A cells ( $P < 0.05$ ). ROS were reduced in LX-2 cells co-cultured with both C3A and C3A-2E1 cells following DDC treatment ( $P < 0.05$ ).

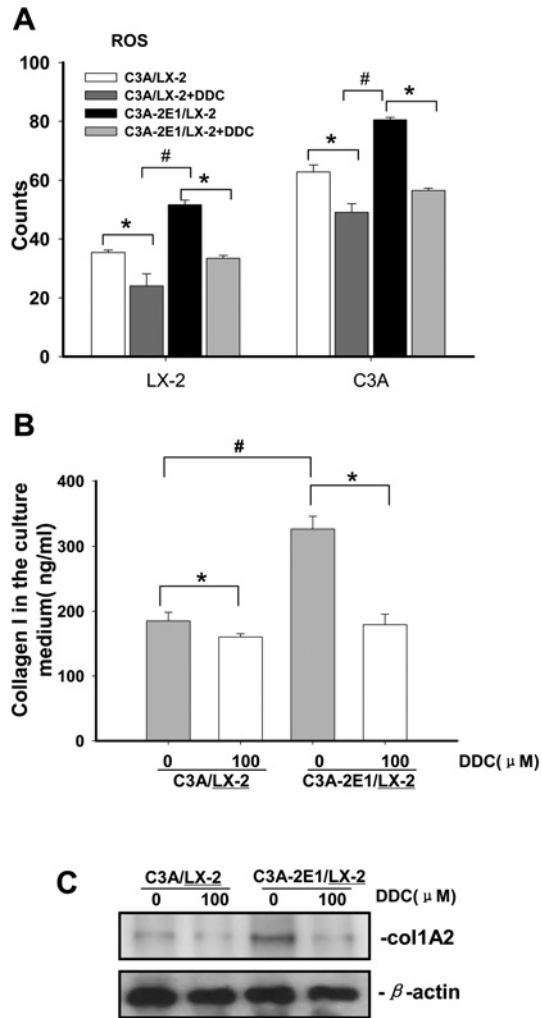

**Figure 2** DDC lowered ROS and collagen I protein in LX-2 cells

The co-culture systems were treated with or without 100 μM DDC for 24 h. (A) Both C3A cells and LX-2 cells were harvested and incubated with 10 μM DCFH-DA at 37 °C for 15 min in the dark. The fluorescence intensity was monitored by flow cytometry using an excitation wavelength of 488 nm and an emission wavelength of 525 nm. Representative results are shown. \*  $P < 0.05$  compared with untreated C3A/LX-2 or C3A-2E1/LX-2. #  $P < 0.05$  compared with C3A/LX-2. (B) Levels of collagen I in the culture medium were assayed by ELISA. \*  $P < 0.05$  compared with untreated C3A/LX-2 or C3A-2E1/LX-2. #  $P < 0.05$  compared with C3A/LX-2. (C) Levels of collagen I in LX-2 cells were assayed by Western blotting.

Since ROS mediate paracrine stimulation of collagen I protein synthesis, and DDC attenuated ROS production in LX-2 cells, the inhibitory effect of DDC on collagen I was assessed. The co-cultures were treated with 100 μM DDC for 24 h. The incubation media were collected and analysed for collagen I by ELISA. The collagen I protein increased in LX-2/C3A-2E1 co-culture compared with the C3A co-culture, and decreased in both systems treated with DDC (Figure 2B). The LX-2 cells were analysed by Western blotting for intracellular collagen I. The collagen type I protein in LX-2 cells increased in the C3A-2E1 co-culture

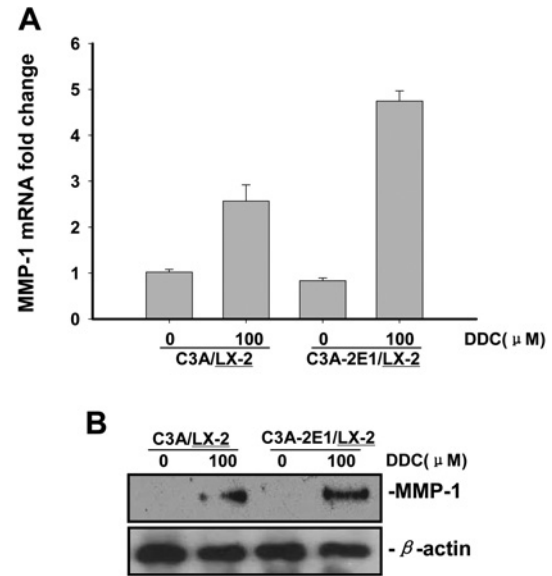

**Figure 3** DDC up-regulates MMP-1 expression in LX-2 cells

Co-culture systems were treated with 100 μM DDC for 24 h. LX-2 cells and the culture medium were collected and analysed. (A) Quantitative RT-PCR results of *MMP-1* expression in LX-2 cells. The results were normalized with  $\beta$ -actin and expressed as fold increase relative to the control in each experiment. (B) 20 μg aliquots of total protein extracts from LX-2 cells were subjected to western blotting analysis with anti-MMP-1 antibody (MAB 901) and  $\beta$ -actin antibody as a loading control, as described in the Materials and Methods section.

compared to the C3A co-culture, and was reduced in both systems following DDC treatment (Figure 2C).

### DDC up-regulates MMP-1 expression in LX-2 cells

The co-cultures were treated with 100 μM DDC for 24 h. As shown in Figure 3A, *MMP-1* mRNA expression in LX-2 cells co-cultured with C3A was up-regulated 2.5-fold by DDC, compared with untreated LX-2 cells co-cultured with C3A cells. *MMP-1* mRNA expression in LX-2 cells co-cultured with C3A-2E1 was up-regulated 4.6-fold by DDC, compared with untreated LX-2 cells co-cultured with C3A-2E1 cells. In addition, DDC caused an up-regulation of the MMP-1 proenzyme in LX-2 cells under both co-culture systems. Note that the up-regulation of MMP-1 was higher in the C3A-2E1 co-culture system than in the C3A co-culture system. These data suggested that the inhibition of CYP2E1 activity by DDC only plays a small role in MMP-1 up-regulation (Figure 3B).

### DDC up-regulates MMP-1 expression in a dose-dependent manner and results in greater enzyme activity

The co-cultures were treated with 25, 50, 100 and 200 μM DDC for 24 h. As shown in Figure 4(A), *MMP-1* mRNA expression in LX-2 cells was up-regulated in the presence of 25 μM

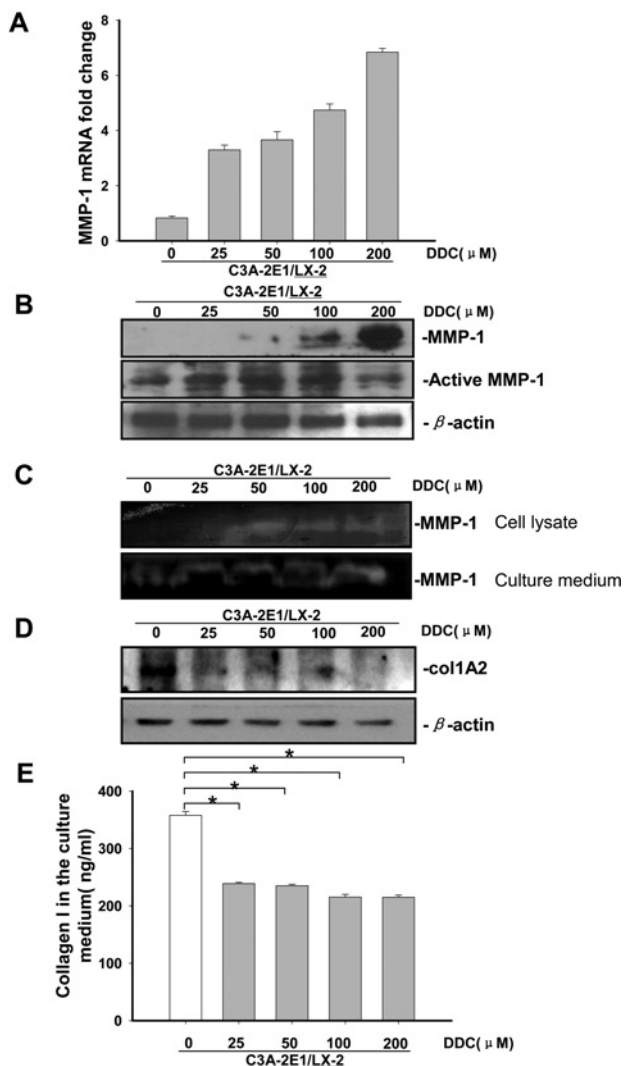

**Figure 4** DDC up-regulates MMP-1 expression in a dose-dependent manner and lowered collagen I in LX-2 cells

Co-culture systems were treated with 25, 50, 100 and 200  $\mu$ M DDC for 24 h. LX-2 cells and the culture medium were collected and analysed. (A) Quantitative RT-PCR results of *MMP-1* expression in LX-2 cells. The results were normalized with  $\beta$ -actin and expressed as fold increase relative to the control in each experiment. (B) 20  $\mu$ g aliquots of total protein extracts from LX-2 cells were subjected to Western blotting analysis with anti-MMP-1 antibody (MAB 901 and MAB 3223 for active form only) and  $\beta$ -actin antibody as a loading control, as described in the Materials and Methods section. (C) 30  $\mu$ g of LX-2 lysates or 20  $\mu$ l aliquots of 10-fold concentrated culture medium with 5 $\times$  loading buffer were assayed by Casein Zymography for MMP-1 activity. (D) Levels of collagen I in LX-2 cells were assayed by western blotting. (E) Levels of collagen I in the culture medium were assayed by ELISA. \* $P < 0.05$  compared with untreated C3A-2E1/LX-2.

(3.2-fold), 50  $\mu$ M (3.5-fold), 100  $\mu$ M (4.6-fold) and 200  $\mu$ M (6.8-fold) DDC, compared with untreated LX-2 cells co-cultured with C3A-2E1 cells. These data suggest that the positive effect of DDC on *MMP-1* expression in LX-2 cells was dose-dependent in the tested range. In addition, the proenzyme of MMP-1 was

up-regulated in a dose-dependent manner in the presence of 50, 100 and 200  $\mu$ M DDC, compared with untreated LX-2 cells co-cultured with C3A-2E1 (Figure 4B).

We next analysed the activity of MMP-1 both in the LX-2 cells and the culture medium to investigate whether increased gene expression results in greater enzymatic activity. The Western blotting results showed that the active enzyme of MMP-1 was up-regulated in a dose-dependent manner in the presence of 50, 100 and 200  $\mu$ M DDC, compared with untreated LX-2 cells co-cultured with C3A-2E1 (Figure 4B). Analysis of MMP-1 concentration by casein zymography and Western blotting has been shown to correlate closely [26,27]. As shown in Figure 4(C), casein zymography demonstrated that MMP-1 activity both in LX-2 cells and in the culture medium closely paralleled levels of gene expression. Levels of collagen I in LX-2 cells and culture medium were analysed by Western blotting and ELISA. As shown in Figures 4(D) and 4(E), the production and secretion of collagen I protein was significantly inhibited by DDC.

### Inhibition of ROS by DDC partially contributes to DDC-induced MMP-1 up-regulation

Since MMP-1 protein in LX-2 cells was up-regulated by DDC in both co-culture systems (with and without CYP2E1), these data suggested that MMP-1 up-regulation by DDC did not merely depend on the inhibition of CYP2E1 activity. However, DDC reduced ROS production in both C3A and C3A-2E1 cells, which ameliorated the pro-oxidant stress in LX-2 cells. We investigated next whether the inhibition of ROS by DDC was involved in the DDC-dependent up-regulation of MMP-1.

Compared with untreated LX-2 cells, MMP-1 protein in LX-2 cells increased after DDC treatment.  $H_2O_2$  treatment reduced this DDC-induced up-regulation. In addition, catalase alone also slightly up-regulated MMP-1. However, no significant increase of MMP-1 was observed in LX-2 cells after vitamin E treatment (Figure 5A). These data suggested that the decrease in ROS by DDC was partially responsible for MMP-1 up-regulation. Compared with untreated LX-2 cells co-cultured with C3A-2E1 cells, collagen-1 protein in LX-2 cells decreased after DDC, catalase and vitamin E treatment. Compared with DDC treated LX-2 cells,  $H_2O_2$  treatment attenuated the DDC-mediated decrease in collagen I (Figure 5B).

### Phospho-proteomic profiling of LX-2 cells co-cultured with C3A-2E1 cells after DDC treatment

Since the decrease in ROS by DDC was only partially responsible for MMP-1 up-regulation, we next analysed possible signal transduction pathways involved in DDC-dependent up-regulation of MMP-1. The human Phospho-MAPK Array Kit, is a rapid, sensitive and semiquantitative tool that is able to identify the levels of phosphorylation of multiple intracellular kinases (Figure 6A). LX-2 cells were co-cultured with C3A-2E1 cells, with or without 100  $\mu$ M DDC, for 1 h.

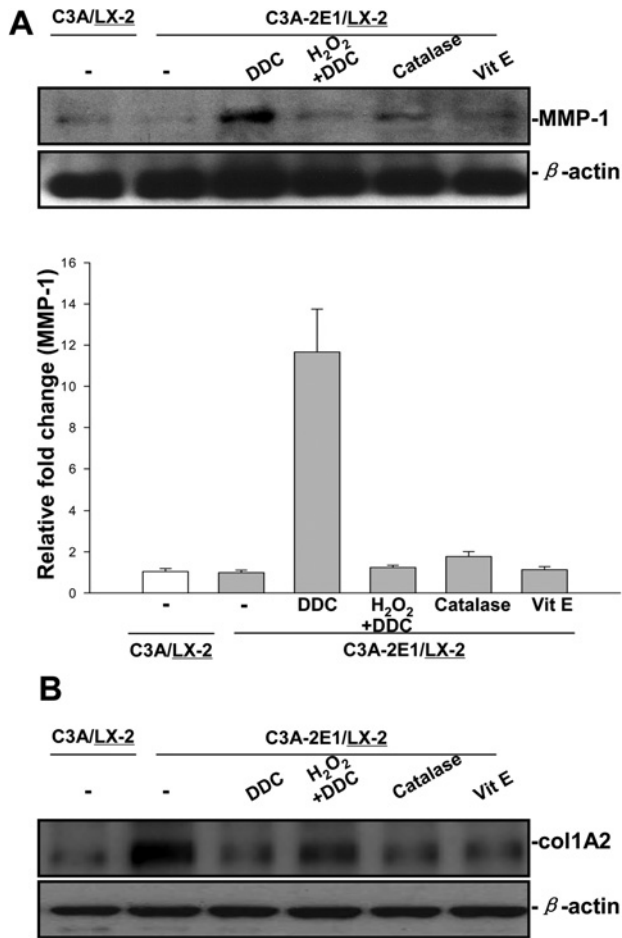

**Figure 5** DDC up-regulates MMP-1 expression in an H<sub>2</sub>O<sub>2</sub>-associated manner

Co-cultures were treated with 100  $\mu$ M DDC, 2000 Units catalase, 25  $\mu$ M vitamin E and 5  $\mu$ M H<sub>2</sub>O<sub>2</sub> combined with 100  $\mu$ M DDC for 24 h. Cell lysates from the LX-2 cells were collected and analysed. **(A)** 20  $\mu$ g aliquots of total protein extracts from LX-2 cells were subjected to Western blotting analysis with anti-MMP-1 antibody (MAB 901) and  $\beta$ -actin antibody as a loading control, as described in the Materials and Methods section. **(B)** Levels of collagen I in LX-2 cells were assayed by Western blotting.

ERK1/2, p38 and Akt were highly activated after 1 h DDC treatment (Figures 6B–6D). To further confirm the phosphoproteome profiling results, the activation of ERK1/2, p38 and Akt were analysed by Western blotting (Figures 6B–6D). To determine if similar mechanisms were involved in LX-2 cells co-cultured with C3A cells (without CYP2E1), we investigated the effect of DDC on the activation of ERK1/2, p38 and Akt in LX-2 cells co-cultured with C3A cells. The results showed that DDC significantly increased the activation of ERK1/2, p38 and Akt in LX-2 cells of both co-cultures (Figure 6E), suggesting that multiple MAPK signalling pathways may contribute to DDC-induced MMP-1 up-regulation.

### DDC up-regulates MMP-1 through activating ERK1/2 and Akt

After demonstrating that Akt, ERK1/2 and p38 may contribute to DDC-induced MMP-1 up-regulation, we examined the effect of DDC on ERK1/2, p38 and Akt activity. To this end, the co-cultures were treated with or without DDC. As shown in Figure 7(A), the phosphorylation of ERK1/2 was induced 15 min after treatment, peaked at 60 min, and sharply decreased to below control values by 240 min. DDC induced the phosphorylation of p38 MAPK and Akt at 15 min, which peaked at 60 min and was sustained for up to 240 min.

To investigate the significance of these effects on the DDC-induced MMP-1 expression, co-cultures were treated with or without DDC for 24 h in the presence or absence of ERK1/2 inhibitor, p38 inhibitor (SB203580) or Akt inhibitor (T3830). The inhibition of ERK1/2 and Akt effectively blocked DDC-induced MMP-1 up-regulation and collagen I decrease. In contrast, after treating cells with SB203580, DDC-induced expression of MMP-1 was higher than the control values. These results indicate that ERK1/2 and Akt activation contributed to MMP-1 up-regulation by DDC (Figures 7B–7D).

### p38 inhibitor SB203580 improves the up-regulation of MMP-1 by DDC through stimulating ERK1/2

Since the co-treatment of p38 inhibitor, SB203580, with DDC resulted in a more pronounced increase in MMP-1 protein level, we investigated the mechanisms that may contribute to this effect. Co-cultures were treated with or without DDC in the presence or absence of the p38 inhibitor (SB203580). As shown in Figure 8, SB203580 significantly activated ERK1/2, whereas it inhibited Akt activity. These data indicate that p38 inhibitor SB203580 improved MMP-1 up-regulation by DDC through stimulating ERK1/2.

## DISCUSSION

Liver fibrosis is a common response to chronic liver injury, regardless of its nature [viral infection, alcohol abuse, polymetabolic syndrome, drug toxicity, autoimmune disorders or metal (especially iron or copper) overload] and is characterized by excessive deposition of ECM components [28]. The development of liver fibrosis is a multicellular process involving paracrine signalling between resident liver cells and non-resident inflammatory cells. The central event in the initiation of liver fibrogenesis relates to the activation of HSC in the area of tissue necrosis and inflammation for which ROS play an important role. Direct stimulation of HSC proliferation and collagen synthesis by products generated from hepatocytes has been shown to contribute to iron- and alcohol-related fibrosis. Production of pro-oxidant agents or lipid peroxidation products in parenchymal cells can lead to an increase in collagen production by HSC [29,30]. Results with the co-culture (HepG2–HSC) model *in vitro*

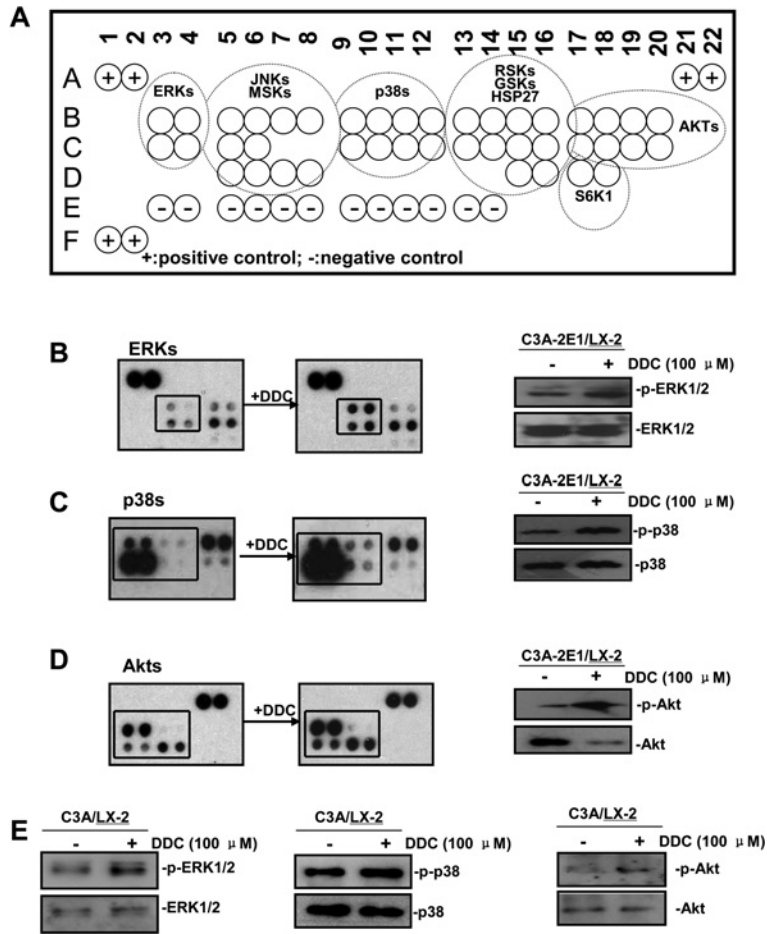

**Figure 6** Phospho-proteome profiling results of LX-2 cells co-cultured with C3A-CYP2E1 cells with or without DDC treatment and detection of the effect of DDC on intracellular kinases in LX-2 cells of co-cultures

200  $\mu\text{g}$  of total cell lysates from LX-2 cells co-cultured with C3A-2E1 cells with or without 100  $\mu\text{M}$  DDC for 1 h were incubated with membranes of the human phospho-MAPK Array Kit according to the manufacturer's instructions. Phospho MAPK Array data were developed on X-ray films following exposure to chemiluminescent reagents. 20  $\mu\text{g}$  aliquots of total cell lysates from LX-2 cells were subjected to Western blotting analysis. (A) Template showing the location of MAPK antibodies spotted onto the human phospho-MAPK Array Kit. (B) The activation status of ERK1/2 in LX-2 cells co-cultured with C3A-2E1 cells after DDC treatment. (C) The activation status of p38 in LX-2 cells co-cultured with C3A-2E1 cells after DDC treatment. (D) The activation status of Akt in LX-2 cells co-cultured with C3A-2E1 cells after DDC treatment. (E) The activation status of ERK1/2, p38 and Akt in LX-2 cells co-cultured with C3A cells after DDC treatment.

indicated that CYP2E1-derived ROS from hepatocytes could increase collagen protein synthesis by HSC [16,17]. *In vivo*, fibrosis has been associated with free radical production in hepatocytes located near HSC, either from iron overload-induced [30,31] or CCl<sub>4</sub>-induced liver injury [32]. Prevention of fibrosis by antioxidants and the CYP2E1 inhibitor (DDC) indicated that ROS play an important role in the CYP2E1-dependent up-regulation [17]. In the present study, we investigated the possible anti-fibrotic mechanisms of DDC. Our data showed that DDC significantly up-regulates the expression of MMP-1 in LX-2 cells, which results in greater enzyme activity of MMP-1. The enhancement of MMP-1 expression by DDC was associated with H<sub>2</sub>O<sub>2</sub> inhibition and coordinated regulation by the ERK1/2 and Akt pathways.

To investigate the possible anti-fibrotic mechanism of DDC, we developed a co-culture model, which was based on co-incubation of human hepatic C3A-2E1 cells, which overexpress CYP2E1, with human hepatic LX-2 cells. Hepatocytes will lose CYP2E1 expression shortly after their separation from animal liver and culturing. C3A, derived from HepG2, do not express CYP2E1, and can therefore be used as CYP2E1 knock-down cells. In agreement with Nieto *et al.* [16], our results showed that C3A-2E1 cells could produce more ROS than C3A cells, which subsequently increased the intracellular concentration of ROS and collagen I in LX-2 cells. However, in this cell model, C3A cells (without CYP2E1) have a high basal level of ROS. It has been shown that some human tumour cell lines produce large amounts of hydrogen peroxide without exogenous



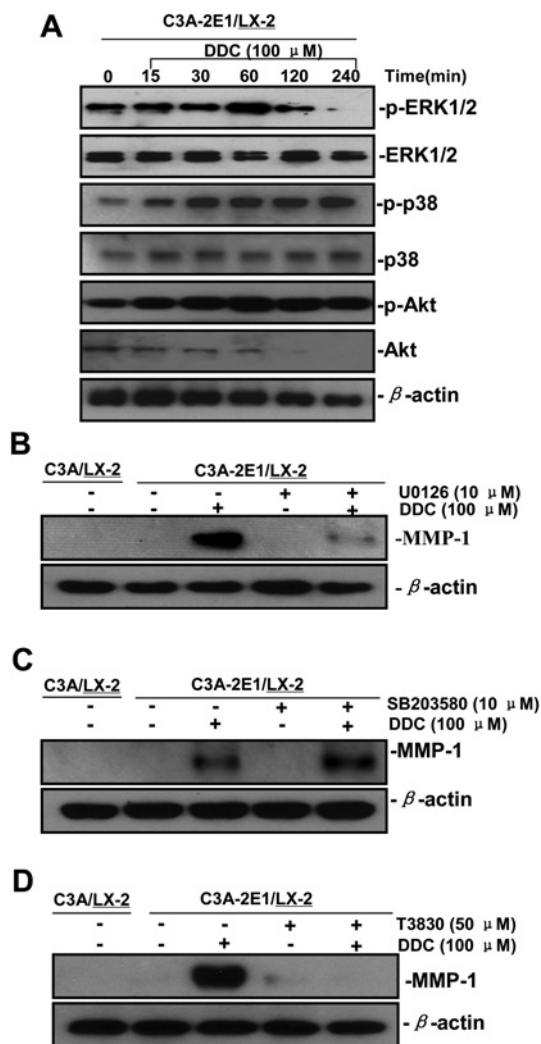

**Figure 7** DDC up-regulates MMP-1 through ERK1/2 and Akt activation

(A) Co-cultures were treated with 100 μM DDC for the indicated time. Phosphorylation of ERK1/2, p38 and Akt were determined by Western blotting analysis. The corresponding non-phosphorylated ERK1/2, p38, Akt and β-actin were used for protein loading control. (B) Co-cultures were treated with or without 100 μM DDC for 24 h in the presence or absence of ERK1/2 inhibitor (U0126, 10 μM). MMP-1 protein levels were analysed by Western blotting. (C) Co-cultures were treated with or without 100 μM DDC for 24 h in the presence or absence of p38 inhibitor (SB203580, 10 μM). MMP-1 protein levels were analysed by Western blotting. (D) Co-cultures were treated with or without 100 μM DDC for 24 h in the presence or absence of Akt inhibitor (T3830, 50 μM). MMP-1 protein levels were analysed by Western blotting.

stimulation [33]. In addition, CYP2E1 is not the only source of H<sub>2</sub>O<sub>2</sub> generation. Endogenous superoxide dismutase may also produce significant amounts of H<sub>2</sub>O<sub>2</sub> at physiological pH [34]. Likewise, several kinds of oxidases, including flavine [35] or NADPH oxidase [36], are able to produce H<sub>2</sub>O<sub>2</sub> directly in mammalian cells. These factors may contribute to the high basal level of ROS in C3A cells.

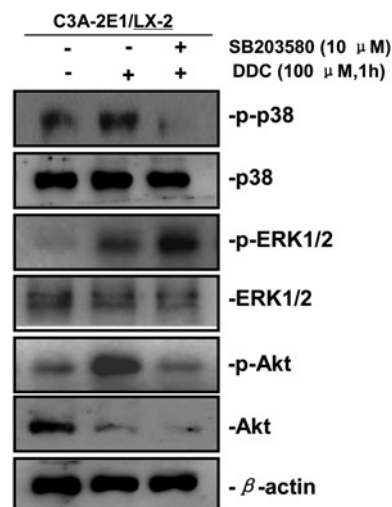

**Figure 8** p38 inhibitor SB203580 improves the up-regulation of MMP-1 by DDC through stimulating ERK1/2

Co-cultures were treated with or without 100 μM DDC for 1 h in the presence or absence of p38 inhibitor (SB203580, 10 μM). Phosphorylation of ERK1/2, p38 and Akt in LX-2 cells of co-cultures were determined by Western blotting analysis.

Although DDC is considered as a relatively selective inhibitor of CYP2E1, our results demonstrated that DDC suppressed the increase in intracellular ROS in LX-2 cells of both co-culture systems. In addition, DDC suppressed the increase of collagen I protein in LX-2 cells and in the culture medium of both co-culture systems. These data suggested that the suppressing effect of DDC on ROS production does not merely depend on inhibition of CYP2E1 activity. It is possible that DDC could also suppress ROS production by inhibiting SOD (superoxide dismutase) activity [37,38].

In the present study, we demonstrated that DDC significantly up-regulated the expression of MMP-1 in LX-2 cells co-cultured with C3A-2E1. Subsequently, the increased expression resulted in greater enzyme activity and a decrease in collagen I. Since the only major difference between the C3A and C3A-2E1 cells is the expression of CYP2E1, the up-regulation of MMP-1 by DDC is likely due to CYP2E1 activity. We also investigated the effect of DDC on MMP-1 in LX-2 cells co-cultured with C3A (without CYP2E1). Interestingly, although MMP-1 up-regulation was not as high as with the C3A-2E1 co-culture system, DDC could also up-regulate the expression of MMP-1 in LX-2 cells co-cultured with C3A cells (without CYP2E1). These data suggested that the effect of DDC on MMP-1 did not only depend on the inhibition of CYP2E1, and that additional mechanisms may be involved.

Since DDC inhibits ROS levels and up-regulate MMP-1 expression in both co-culture systems, it was important to explore the inhibitory effect of DDC on ROS and the stimulatory effect on MMP-1 expression. Our results show that H<sub>2</sub>O<sub>2</sub> treatment significantly attenuated DDC-induced up-regulation of MMP-1 expression in LX-2 cells, suggesting that H<sub>2</sub>O<sub>2</sub> inhibition by

DDC partially contributed to the up-regulation of MMP-1 by DDC. In addition, catalase treatment alone, which is an antioxidative enzyme that degrades  $H_2O_2$ , slightly up-regulated MMP-1 expression. These findings suggest that  $H_2O_2$  inhibition by DDC only plays a small role in the MMP-1 up-regulation by DDC.

MAPKs, a ubiquitous group of serine/threonine kinases, play a crucial role in transmitting transmembrane signals required for cell growth, differentiation and apoptosis. Previous studies have shown that MAPK pathways mediate MMP-1 expression induced by various stimuli [39,40]. For example, the ERK1/2 pathway mediates the activation of the MMP-1 promoter *via* an AP-1 element induced by Ras, serum, phorbol ester, insulin and oncostatin [41,42], and specific activation of ERK1/2 induces MMP-1 production [43]. However, p38 MAPK has opposing effects on *MMP-1* gene expression depending on the inducing agent. p38 MAPK activated by interleukin-1 [44], tumor necrosis factor- $\alpha$  [44], C2 ceramide [45] or okadaic acid [46] up-regulates MMP-1 gene expression. In contrast, activation of p38 induced by three-dimensional collagen lattices or by arsenite inhibits *MMP-1* gene expression [47,48]. These data suggest that coordinated activation of multiple MAPK pathways determines the rate of *MMP-1* gene expression. Akt, a serine/threonine protein kinase, plays a critical role in controlling the balance between apoptosis and cell survival in response to extra- and intracellular signalling [49]. Three isoforms, such as Akt1, Akt2 and Akt3, are homologous, but differ slightly in the localization of their regulatory phosphorylation sites in mammals. Akt1 is the predominant isoform in most tissues and is activated by phosphorylation on Ser<sup>474</sup> and Thr<sup>308</sup>. Previous studies have shown that Akt activation was also involved in MMP-1 secretion [50,51].

In the present study, we found that DDC activated ERK1/2, p38 and Akt in LX-2 cells. The ERK1/2 inhibitor U0126 and Akt inhibitor T3830 suppressed the DDC-induced MMP-1 expression, suggesting that ERK1/2 and Akt are involved in this up-regulation. In addition, our findings demonstrated that DDC-mediated induction of MMP-1 was improved when treated with SB203580 (p38 MAPK inhibitor). To investigate the possible mechanisms, we observed the effect of SB203580 on the activation of ERK1/2 and Akt by DDC. Our data showed that SB203580 significantly activated ERK1/2, while inhibiting Akt activation. These results indicate that the p38 MAPK acts as a negative regulator of MMP-1 induction following DDC treatment in LX-2 cells, through ERK1/2 stimulation.

In conclusion, this is the first report demonstrating that DDC significantly induces MMP-1 expression, which results in greater enzyme activity. In LX-2 cells, this induction was partially due to the inhibition of ROS production, and was regulated in a coordinated manner by the ERK1/2, p38 and Akt pathways. When considering antifibrotic therapy, the approach should not only target the causative agent(s) of liver injury, but also focus on HSC activation status, with two complementary objectives: (a) to directly down-regulate HSC activation; (b) to increase ECM degradation [52]. Since DDC not only inhibits the ROS production that activates HSC and stimulates collagen synthesis, but also induces MMP-1 expression that degrades the collagen protein

and other ECM, we believe that our findings will appeal to both researchers and clinicians.

---

#### AUTHOR CONTRIBUTION

Tianhui Liu and Hong You designed the study. Tianhui Liu performed the Western blotting and phospho-proteome profiling assay experiments. Ping Wang performed the ROS measurement, ELISA and casein zymography assay experiments. Min Cong performed the RT-PCR and quantitative RT-PCR experiments. Youqing Xu performed the co-culture experiments. Jidong Jia analysed the Western blotting and ELISA results. Tianhui Liu wrote the paper.

---

---

#### ACKNOWLEDGEMENTS

The authors thank Lieming Xu (Institute of Liver Diseases; Shanghai University of Traditional Chinese Medicine; The Second Division of Liver Diseases; Shanghai Shuguang Hospital; Shanghai, China) for the human stellate cell line (LX-2). We acknowledge Medjaden Bioscience Limited for assisting in the preparation of this manuscript.

---

---

#### FUNDING

This work was supported by the Wang Baoen Liver Fibrosis Foundation [grant number 20090034], and the National Natural Science Foundation of China [grant numbers 81100287, 30972602 and 81000172].

---

#### REFERENCES

- 1 Evans, R. G., Engel, C., Wheatley, C. and Nielsen, J. (1982) Modification of the sensitivity and repair of potentially lethal damage by diethyldithiocarbamate during and following exposure of plateau-phase cultures of mammalian cells to radiation and cis-diamminedichloroplatinum(II). *Cancer Res.* **42**, 3074–3078
- 2 Gaval-Cruz, M. and Weinschenker, D. (2009) mechanisms of disulfiram-induced cocaine abstinence: antabuse and cocaine relapse. *Mol. Interv.* **9**, 175–187
- 3 Stott, I., Murthy, A., Robinson, A., Thomas, N. W. and Fry, J. R. (1997) Low-dose diethyldithiocarbamate attenuates the hepatotoxicity of 1,3-dichloro-2-propanol and selectively inhibits CYP2E1 activity in the rat. *Hum. Exp. Toxicol.* **16**, 262–266
- 4 Pratt-Hyatt, M., Lin, H. L. and Hollenberg, P. F. (2010) Mechanism-based inactivation of human CYP2E1 by diethyldithiocarbamate. *Drug Metab. Dispos.* **38**, 2286–2292
- 5 Koop, D. R. (1992) Oxidative and reductive metabolism by cytochrome P450 2E1. *FASEB J.* **6**, 724–730
- 6 Lieber, C. S. (1997) Cytochrome P-4502E1: its physiological and pathological role. *Physiol. Rev.* **77**, 517–544
- 7 Lieber, C. S. (1997) Role of oxidative stress and antioxidant therapy in alcoholic and nonalcoholic liver diseases. *Adv. Pharmacol.* **38**, 601–628

- 8 Leung, T. M. and Nieto, N. (2013) CYP2E1 and oxidant stress in alcoholic and non-alcoholic fatty liver disease. *J. Hepatol.* **58**, 395–398
- 9 Sanyal, A. J., Campbell-Sargent, C., Mirshahi, F., Rizzo, W. B., Contos, M. J., Sterling, R. K., Luketic, V. A., Shiffman, M. L. and Clore, J. N. (2001) Nonalcoholic steatohepatitis: association of insulin resistance and mitochondrial abnormalities. *Gastroenterology* **120**, 1183–1192
- 10 Weltman, M. D., Farrell, G. C. and Liddle, C. (1996) Increased hepatocyte CYP2E1 expression in a rat nutritional model of hepatic steatosis with inflammation. *Gastroenterology* **111**, 1645–1653
- 11 Friedman, S. L. (2008) Hepatic stellate cells: protean, multifunctional, and enigmatic cells of the liver. *Physiol Rev.* **88**, 125–172
- 12 Friedman, S. L. (2004) Mechanisms of disease: mechanisms of hepatic fibrosis and therapeutic implications. *Nat. Clin. Pract. Gastroenterol. Hepatol.* **1**, 98–105
- 13 Tomasek, J. J., Gabbiani, G., Hinz, B., Chaponnier, C. and Brown, R. A. (2002) Myofibroblasts and mechano-regulation of connective tissue remodelling. *Nat. Rev. Mol. Cell Biol.* **3**, 349–363
- 14 Wynn, T. A. (2007) Common and unique mechanisms regulate fibrosis in various fibroproliferative diseases. *J. Clin. Invest.* **117**, 524–529
- 15 Wynn, T. A. (2008) Cellular and molecular mechanisms of fibrosis. *J. Pathol.* **214**, 199–210
- 16 Nieto, N., Friedman, S. L. and Cederbaum, A. I. (2002) Cytochrome P450 2E1-derived reactive oxygen species mediate paracrine stimulation of collagen I protein synthesis by hepatic stellate cells. *J. Biol. Chem.* **277**, 9853–9864
- 17 Nieto, N., Friedman, S. L. and Cederbaum, A. I. (2002) Stimulation and proliferation of primary rat hepatic stellate cells by cytochrome P450 2E1-derived reactive oxygen species. *Hepatology* **35**, 62–73
- 18 Devi, S. L., Viswanathan, P. and Anuradha, C. V. (2010) Regression of liver fibrosis by taurine in rats fed alcohol: effects on collagen accumulation, selected cytokines and stellate cell activation. *Eur. J. Pharmacol.* **647**, 161–170
- 19 Wasser, S., Lim, G. Y., Ong, C. N. and Tan, C. E. (2001) Anti-oxidant ebseles causes the resolution of experimentally induced hepatic fibrosis in rats. *J. Gastroenterol. Hepatol.* **16**, 1244–1253
- 20 Zamin, Jr, I., Mattos, A. A., Mattos, A. Z., Coral, G., Santos, D. and Rhoden, C. (2010) The vitamin E reduces liver lipoperoxidation and fibrosis in a model of nonalcoholic steatohepatitis. *Arq Gastroenterol.* **47**, 86–92
- 21 Zhen, M. C., Wang, Q., Huang, X. H., Cao, L. Q., Chen, X. L., Sun, K., Liu, Y. J., Li, W. and Zhang, L. J. (2007) Green tea polyphenol epigallocatechin-3-gallate inhibits oxidative damage and preventive effects on carbon tetrachloride-induced hepatic fibrosis. *J. Nutr. Biochem.* **18**, 795–805
- 22 Lauer-Fields, J. L., Juska, D. and Fields, G. B. (2002) Matrix metalloproteinases and collagen catabolism. *Biopolymers* **66**, 19–32
- 23 Friedman, S. L. (2008) Hepatic fibrosis – overview. *Toxicology* **254**, 120–129
- 24 Elkington, P. T., Green, J. A. and Friedland, J. S. (2006) Filter sterilization of highly infectious samples to prevent false negative analysis of matrix metalloproteinase activity. *J. Immunol. Methods* **309**, 115–119
- 25 Snoek-van Beurden, P. A. and Von den Hoff, J. W. (2005) Zymographic techniques for the analysis of matrix metalloproteinases and their inhibitors. *Biotechniques* **38**, 73–83
- 26 Elkington, P. T., Emerson, J. E., Lopez-Pascua, L. D., O’Kane, C. M., Horncastle, D. E., Boyle, J. J. and Friedland, J. S. (2005) Mycobacterium tuberculosis up-regulates matrix metalloproteinase-1 secretion from human airway epithelial cells via a p38 MAPK switch. *J. Immunol.* **175**, 5333–5340
- 27 Elkington, P. T., Nuttall, R. K., Boyle, J. J., O’Kane, C. M., Horncastle, D. E., Edwards, D. R. and Friedland, J. S. (2005) Mycobacterium tuberculosis, but not vaccine BCG, specifically upregulates matrix metalloproteinase-1. *Am. J. Respir. Crit Care Med.* **172**, 1596–1604
- 28 Henderson, N. C. and Forbes, S. J. (2008) Hepatic fibrogenesis: from within and outwith. *Toxicology* **254**, 130–135
- 29 Niemela, O., Parkkila, S., Yla-Herttuala, S., Villanueva, J., Ruebner, B. and Halsted, C. H. (1995) Sequential acetaldehyde production, lipid peroxidation, and fibrogenesis in micropig model of alcohol-induced liver disease. *Hepatology* **22**, 1208–1214
- 30 Pietrangelo, A., Gualdi, R., Casalgrandi, G., Geerts, A., De, B. P., Montosi, G. and Ventura, E. (1994) Enhanced hepatic collagen type I mRNA expression into fat-storing cells in a rodent model of hemochromatosis. *Hepatology* **19**, 714–721
- 31 Houglum, K., Filip, M., Witztum, J. L. and Chojkier, M. (1990) Malondialdehyde and 4-hydroxynonenol protein adducts in plasma and liver of rats with iron overload. *J. Clin. Invest.* **86**, 1991–1998
- 32 Kim, K. Y., Choi, I. and Kim, S. S. (2000) Progression of hepatic stellate cell activation is associated with the level of oxidative stress rather than cytokines during CCl4-induced fibrogenesis. *Mol. Cells* **10**, 289–300
- 33 Szatrowski, T. P. and Nathan, C. F. (1991) Production of large amounts of hydrogen peroxide by human tumor cells. *Cancer Res.* **51**, 794–798
- 34 Fridovich, I. (1989) Superoxide dismutases. An adaptation to a paramagnetic gas. *J. Biol. Chem.* **264**, 7761–7764
- 35 Mueller, S., Weber, A., Fritz, R., Mutze, S., Rost, D., Walczak, H., Volkl, A. and Stremmel, W. (2002) Sensitive and real-time determination of H2O2 release from intact peroxisomes. *Biochem. J.* **363**, 483–491
- 36 Ushio-Fukai, M. and Alexander, R. W. (2004) Reactive oxygen species as mediators of angiogenesis signaling: role of NAD(P)H oxidase. *Mol. Cell Biochem.* **264**, 85–97
- 37 Misra, H. P. (1979) Reaction of copper-zinc superoxide dismutase with diethyldithiocarbamate. *J. Biol. Chem.* **254**, 11623–11628
- 38 Westman, G. and Marklund, S. L. (1980) Diethyldithiocarbamate, a superoxide dismutase inhibitor, decreases the radioresistance of Chinese hamster cells. *Radiat. Res.* **83**, 303–311
- 39 Anand, M., Van Meter, T. E. and Fillmore, H. L. (2011) Epidermal growth factor induces matrix metalloproteinase-1 (MMP-1) expression and invasion in glioma cell lines via the MAPK pathway. *J. Neurooncol.* **104**, 679–687
- 40 Lee, Y., Kim, H., Kim, S., Kim, K. H. and Chung, J. H. (2010) Activation of toll-like receptors 2, 3 or 5 induces matrix metalloproteinase-1 and -9 expression with the involvement of MAPKs and NF-kappaB in human epidermal keratinocytes. *Exp. Dermatol.* **19**, e44–e49
- 41 Frost, J. A., Geppert, T. D., Cobb, M. H. and Feramisco, J. R. (1994) A requirement for extracellular signal-regulated kinase (ERK) function in the activation of AP-1 by Ha-Ras, phorbol 12-myristate 13-acetate, and serum. *Proc. Natl. Acad. Sci. U.S.A.* **91**, 3844–3848
- 42 Korzus, E., Nagase, H., Rydell, R. and Travis, J. (1997) The mitogen-activated protein kinase and JAK-STAT signaling pathways are required for an oncostatin M-responsive element-mediated activation of matrix metalloproteinase 1 gene expression. *J. Biol. Chem.* **272**, 1188–1196
- 43 Ta, N. N., Li, Y., Schuyler, C. A., Lopes-Virella, M. F. and Huang, Y. (2010) DPP-4 (CD26) inhibitor alogliptin inhibits TLR4-mediated ERK activation and ERK-dependent MMP-1 expression by U937 histiocytes. *Atherosclerosis* **213**, 429–435
- 44 Brauchle, M., Gluck, D., Di, P. F., Han, J. and Gram, H. (2000) Independent role of p38 and ERK1/2 mitogen-activated kinases in the upregulation of matrix metalloproteinase-1. *Exp. Cell Res.* **258**, 135–144
- 45 Reunanen, N., Westermarck, J., Hakkinen, L., Holmstrom, T. H., Elo, I., Eriksson, J. E. and Kahari, V. M. (1998) Enhancement of fibroblast collagenase (matrix metalloproteinase-1) gene expression by ceramide is mediated by extracellular signal-regulated and stress-activated protein kinase pathways. *J. Biol. Chem.* **273**, 5137–5145

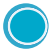

- 46 Westermarck, J., Holmstrom, T., Ahonen, M., Eriksson, J. E. and Kahari, V. M. (1998) Enhancement of fibroblast collagenase-1 (MMP-1) gene expression by tumor promoter okadaic acid is mediated by stress-activated protein kinases Jun N-terminal kinase and p38. *Matrix Biol.* **17**, 547–557
- 47 Westermarck, J., Li, S. P., Kallunki, T., Han, J. and Kahari, V. M. (2001) p38 mitogen-activated protein kinase-dependent activation of protein phosphatases 1 and 2A inhibits MEK1 and MEK2 activity and collagenase 1 (MMP-1) gene expression. *Mol. Cell Biol.* **21**, 2373–2383
- 48 Xu, J., Clark, R. A. and Parks, W. C. (2001) p38 mitogen-activated kinase is a bidirectional regulator of human fibroblast collagenase-1 induction by three-dimensional collagen lattices. *Biochem. J.* **355**, 437–447
- 49 Vasudevan, K. M. and Garraway, L. A. (2010) AKT signaling in physiology and disease. *Curr. Top. Microbiol. Immunol.* **347**, 105–133
- 50 Forough, R., Weylie, B., Collins, C., Parker, J. L., Zhu, J., Barhoumi, R. and Watson, D. K. (2006) Transcription factor Ets-1 regulates fibroblast growth factor-1-mediated angiogenesis *in vivo*: role of Ets-1 in the regulation of the PI3K/AKT/MMP-1 pathway. *J. Vasc. Res.* **43**, 327–337
- 51 Oh, J. H., Kim, A., Park, J. M., Kim, S. H. and Chung, A. S. (2006) Ultraviolet B-induced matrix metalloproteinase-1 and -3 secretions are mediated via PTEN/Akt pathway in human dermal fibroblasts. *J. Cell Physiol.* **209**, 775–785
- 52 Schuppan, D. and Pinzani, M. (2012) Anti-fibrotic therapy: lost in translation? *J. Hepatol.* **56** (Suppl. 1), S66–S74

---

Received 22 March 2013/8 April 2013; accepted 10 April 2013

---

Published as Immediate Publication 12 April 2013, doi 10.1042/BSR20130033

---
